# Supplementary material for: Structural chemistry of organically-templated metal fluorides
Source: Royal Society of Chemistry journal article supplement (doi:10.1039/c002333g), 2010-01-01
Supplement: c002333g.pdf [file c002333g.pdf]

**Table S1:** Names and abbreviations used for the amine moieties

|                            |                                                         |                                                                        |                                          |
|----------------------------|---------------------------------------------------------|------------------------------------------------------------------------|------------------------------------------|
| <i>meam</i>                | methylamine                                             | $\text{NH}_2\text{CH}_3$                                               | $\text{CH}_5\text{N}$                    |
| <i>dma</i>                 | dimethylamine                                           | $(\text{CH}_3)_2\text{NH}$                                             | $\text{C}_2\text{H}_7\text{N}$           |
| <i>en</i>                  | 1,2-diaminoethane                                       | $\text{H}_2\text{N}(\text{CH}_2)_2\text{NH}_2$                         | $\text{C}_2\text{H}_8\text{N}_2$         |
| <i>dap</i>                 | 1,3-diaminopropane                                      | $\text{H}_2\text{N}(\text{CH}_2)_3\text{NH}_2$                         | $\text{C}_3\text{H}_{10}\text{N}_2$      |
| <i>dab</i>                 | 1,4-diaminobutane                                       | $\text{H}_2\text{N}(\text{CH}_2)_4\text{NH}_2$                         | $\text{C}_4\text{H}_{12}\text{N}_2$      |
| <i>dado</i>                | 1,12-diaminododecane                                    | $\text{H}_2\text{N}(\text{CH}_2)_{12}\text{NH}_2$                      | $\text{C}_{12}\text{H}_{28}\text{N}_2$   |
| <i>dien</i>                | bis-(2-aminoethyl)amine                                 | $(\text{NH}_2(\text{CH}_2)_2)_2\text{NH}$                              | $\text{C}_4\text{H}_{13}\text{N}_3$      |
| <i>dach</i>                | cyclohexane-1,2-diamine                                 | $((\text{NH}_2)\text{CH}(\text{C}_2\text{H}_4))_2$                     | $\text{C}_6\text{H}_{14}\text{N}_2$      |
| <i>dabco</i>               | diaminobicyclo-octane                                   | $\text{N}(\text{C}_2\text{H}_4)_3\text{N}$                             | $\text{C}_6\text{H}_{12}\text{N}_2$      |
| <i>me<sub>3</sub>adam</i>  | 3,5,7-trimethyl-adamantane                              |                                                                        | $\text{C}_{13}\text{H}_{21}$             |
| <i>dipa</i>                | 2,2'-dipyridylamine                                     |                                                                        | $\text{C}_{10}\text{H}_9\text{N}_3$      |
| <i>col</i>                 | 2,4,6-trimethylpyridine = collidine                     | $\text{CH}_3(\text{C}_5\text{H}_2\text{N})(\text{CH}_3)_2$             | $\text{C}_8\text{H}_{11}\text{N}$        |
| <i>gua</i>                 | guanidine                                               | $(\text{NH}_2)_2\text{C}(\text{NH})$                                   | $\text{CH}_5\text{N}_3$                  |
| <i>amgua</i>               | aminoguanidine                                          | $(\text{NH}_2)_2\text{CN}(\text{NH}_2)$                                | $\text{CH}_6\text{N}_4$                  |
| <i>guan</i>                | guanine                                                 |                                                                        | $\text{C}_5\text{H}_5\text{N}_5\text{O}$ |
| <i>guaz</i>                | 3,5-diamino-1,2,4-triazole (guanazole)                  | $\text{H}_2\text{N}(\text{C}_2\text{HN}_3)\text{NH}_2$                 | $\text{C}_2\text{H}_5\text{N}_5$         |
| <i>3-amtriaz</i>           | 3-amino-1,2,4-triazole                                  |                                                                        | $\text{C}_2\text{H}_4\text{N}_4$         |
| <i>4-amtriaz</i>           | 4-amino-1,2,4-triazole                                  |                                                                        | $\text{C}_2\text{H}_4\text{N}_4$         |
| <i>im</i>                  | imidazole                                               |                                                                        | $\text{C}_3\text{H}_4\text{N}_2$         |
| <i>phenetam</i>            | 1-phenylethylamine                                      | $(\text{C}_6\text{H}_5)(\text{CH}_2)_2\text{NH}_2$                     | $\text{C}_8\text{H}_{11}\text{N}$        |
| <i>pipz</i>                | piperazine                                              | $\text{NH}(\text{C}_2\text{H}_4)_2\text{NH}$                           | $\text{C}_4\text{H}_{10}\text{N}_2$      |
| <i>hpipz</i>               | homopiperazine                                          | $(\text{CH}_2)(\text{CH}_2(\text{NH})\text{CH}_2)_2$                   | $\text{C}_5\text{H}_{12}\text{N}_2$      |
| <i>mepipz</i>              | 2-methylpiperazine                                      | $\text{NH}((\text{C}_2\text{H}_4)(\text{CH}_3\text{CHCH}_2))\text{NH}$ | $\text{C}_5\text{H}_{12}\text{N}_2$      |
| <i>me<sub>2</sub>pipz</i>  | 1,4-dimethylpiperazine                                  | $((\text{CH}_3)\text{CH}(\text{CH}_2)\text{NH})_2$                     | $\text{C}_6\text{H}_{14}\text{N}_2$      |
| <i>py</i>                  | pyridine                                                | $\text{CH}(\text{C}_2\text{H}_2)_2\text{N}$                            | $\text{C}_5\text{H}_5\text{N}$           |
| <i>bipy</i>                | 4,4'-bipyridine                                         | $(\text{C}(\text{C}_2\text{H}_2)_2\text{N})_2$                         | $\text{C}_{10}\text{H}_8\text{N}_2$      |
| <i>dpe</i>                 | trans-1,2-bis(4-pyridinio)ethylene                      | $(\text{CH}_2\text{C}(\text{C}_2\text{H}_2)_2\text{N})_2$              | $\text{C}_{12}\text{H}_{12}\text{N}_2$   |
| <i>teta</i>                | triethylenetetramine                                    | $(\text{CH}_2(\text{NH}_2)(\text{CH}_2)_2\text{NH}_2)_2$               | $\text{C}_6\text{H}_{20}\text{N}_4$      |
| <i>tetra</i>               | pentaerythrityltetramine                                | $\text{C}(\text{CH}_2\text{NH}_2)_4$                                   | $\text{C}_5\text{H}_{16}\text{N}_4$      |
| <i>tren</i>                | tris-(2-aminoethyl)amine                                | $\text{N}((\text{CH}_2)_2\text{NH}_2)_3$                               | $\text{C}_6\text{H}_{18}\text{N}_4$      |
| <i>triaz</i>               | 1,2,4-triazole                                          |                                                                        | $\text{C}_2\text{H}_3\text{N}_3$         |
| <i>5-amtetraz</i>          | 5-amino-tetrazole                                       |                                                                        | $\text{CH}_3\text{N}_5$                  |
| <i>pyraz</i>               | pyrazole                                                |                                                                        | $\text{C}_3\text{H}_4\text{N}_2$         |
| <i>3-mebea</i>             | 3-methylbenzylamine                                     | $\text{C}_6\text{H}_4(\text{CH}_3)\text{CH}_2\text{NH}_2$              | $\text{C}_8\text{H}_{11}\text{N}$        |
| <i>4-clbea</i>             | 4-chlorobenzylamine                                     | $\text{C}_6\text{H}_4\text{ClCH}_2\text{NH}_2$                         | $\text{C}_7\text{H}_8\text{NCl}$         |
| <i>tacid</i>               | 1,4,8,11-tetra-azacyclotetradecane                      |                                                                        | $\text{C}_{10}\text{H}_{24}\text{N}_4$   |
| <i>me<sub>4</sub>tacid</i> | 1,4,8,11-tetramethyl-1,4,8,11-tetra-azacyclotetradecane |                                                                        | $\text{C}_{14}\text{H}_{32}\text{N}_4$   |

|           |        |  |                                    |
|-----------|--------|--|------------------------------------|
| <i>me</i> | methyl |  | $\text{CH}_3-$                     |
| <i>et</i> | ethyl  |  | $\text{C}_2\text{H}_5-$            |
| <i>ph</i> | phenyl |  | $\text{C}_6\text{H}_5-$            |
| <i>be</i> | benzyl |  | $\text{C}_6\text{H}_5\text{CH}_2-$ |
